# Supplementary material for: Airway to Lung Volume Ratio on CT is Associated with Pulmonary Function Transition from Obstructive to Restrictive Pattern in Obesity
Source: Research Square preprint supplement (doi:10.21203/rs.3.rs-1238490/v1), 2022-01-13
Supplement: Supplementary file 1 [file db3182891b431d5088236670.docx]

**Table S 1: Demographic data and CT measurements by ventilation status**

| **Parameter** | **Normal ventilation** | **Restrictive disorders** | **Obstructive disorders** | ***P* Value** |
| --- | --- | --- | --- | --- |
| Number (female) | 49（34） | 17（4） | 10（6） |  |
| Age (years) | 31 (26-35) | 34 (30-38) | 31 (24-40) | 0.31 |
| BMI (kg/m2) | 38.90 (32.85-46.20) | 43.30 (35.65-55.80) | 38.75 (32.20-52.20) | 0.08 |
| ***Pulmonary Function*** |  |  |  |  |
| ERV (L) | 1.32 (1.23-1.54) | 1.44 (1.31-1.54) | 1.39 (1.12-1.50) | 0.39 |
| VC (L) | 3.86 (3.54-4.30) | 3.30 (2.54-3.46) * | 3.77 (2.73-4.98) | <0.001 |
| FEV1%pred | 97.90 (93.65-107.15) | 74.00 (70.50-74.00) * | 83.75(66.90-99.83) * | <0.001 |
| FEV1/FVC%pred | 102.20 (99.80-104.05) | 105.00(101.30-107.45) | 90.13 (88.55-90.65) *‡ | <0.001 |
| FVC%pred | 95.50 (92.10-99.85) | 72.30 (67.50-73.70) * | 101.00 (84.95-112.20) ‡ | <0.001 |
| ***Imaging*** |  |  |  |  |
| WA% | 0.68(0.59-0.71) | 0.70(0.61-0.73) | 0.65(0.60-0.76) | 0.59 |
| Pi10(mm) # | 3.98 ± 0.87 | 4.14 ± 0.67 | 3.85 ± 0.76 | 0.65 |
| AWV% | 0.89 (0.82-1.00) | 1.20 (1.15-1.32) * | 0.65 (0.60-0.68) *‡ | <0.001 |
| AFD | 1.83 (1.82-1.85) | 1.84 (1.83-1.84) | 1.83 (1.83-1.86) | 0.82 |
| TAC (n) | 124.0 (93.0-153.50) | 108.00 (85.50-143.50) | 119.00 (90.25-154.75) | 0.33 |

Note. — Unless otherwise specified, data are medians, with interquartile ranges in parentheses. BMI=body mass index; WA%=wall area percent; Pi10= the square root of the airway wall area for a theoretical airway with 10mm internal perimeter; AWV%= airway volume percent. AFD= airway fractal dimension; TAC= total airway count; ERV= expiratory reserve volume; VC= vital capacity; FEV1= forced expiratory volume in one second; FVC= forced vital capacity. %pred=percent predicted. Significance of difference (*P* < 0.05): * Significantly different from Group of normal ventilation; ‡ Significantly different from Group of restrictive disorders. # Data are means ± standard.
